# Supplementary material for: Water−Processed Organic Solar Cell with Efficiency Exceeding 11%
Source: MDPI journal article supplement (doi:10.3390/polym14194229), 2022-10-09
Supplement: s1 [file s1]

# Water-Processed Organic Solar Cell with Efficiency

## Exceeding 11%

Chen Xie \*, Songqiang Liang, Guangye Zhang and Shunpu Li \*

College of New Materials and New Energies, Shenzhen Technology University, Shenzhen 518118, China

\* Correspondence: xiechen@sztu.edu.cn (C.X.); lishunpu@sztu.edu.cn (S.L.)

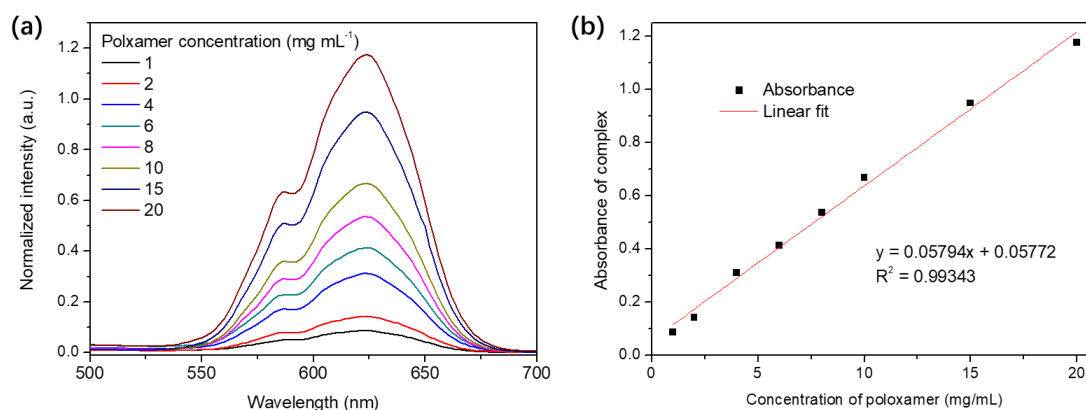

**Figure S1.** (a) Absorption and (b) calibration curve used to determine concentration of free poloxamer during centrifugal washing. Poloxamer and cobalt thiocyanate formed a dark blue complex (absorbance at 623 nm).

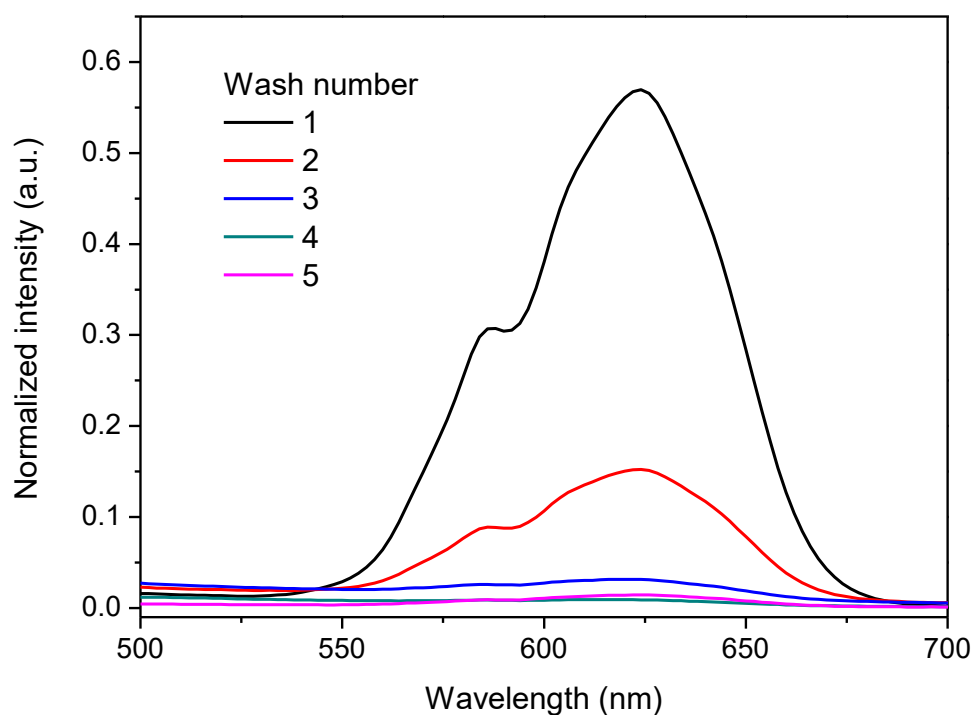

**Figure S2.** Absorption used to determine the concentration of poloxamer in filtrates collected from each centrifugal washing step.

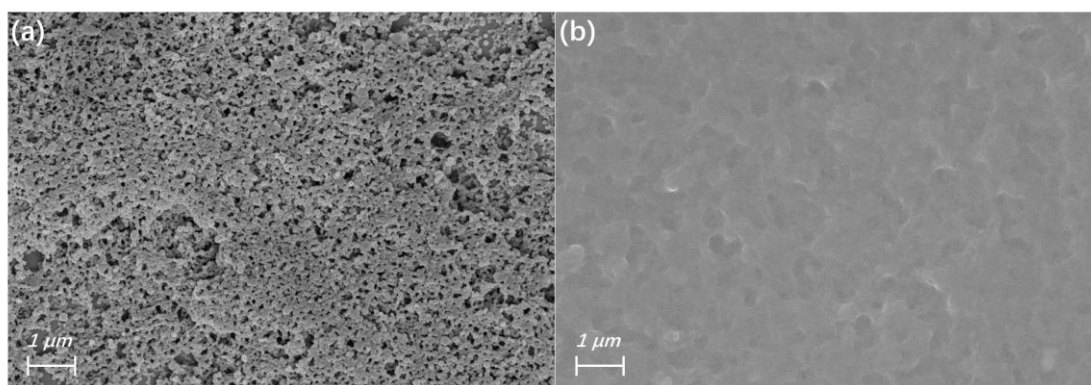

**Figure S3.** SEM images of PM6:BTP-eC9 NP films: (a) as cast; (b) 100 °C annealing for 10 minutes. .

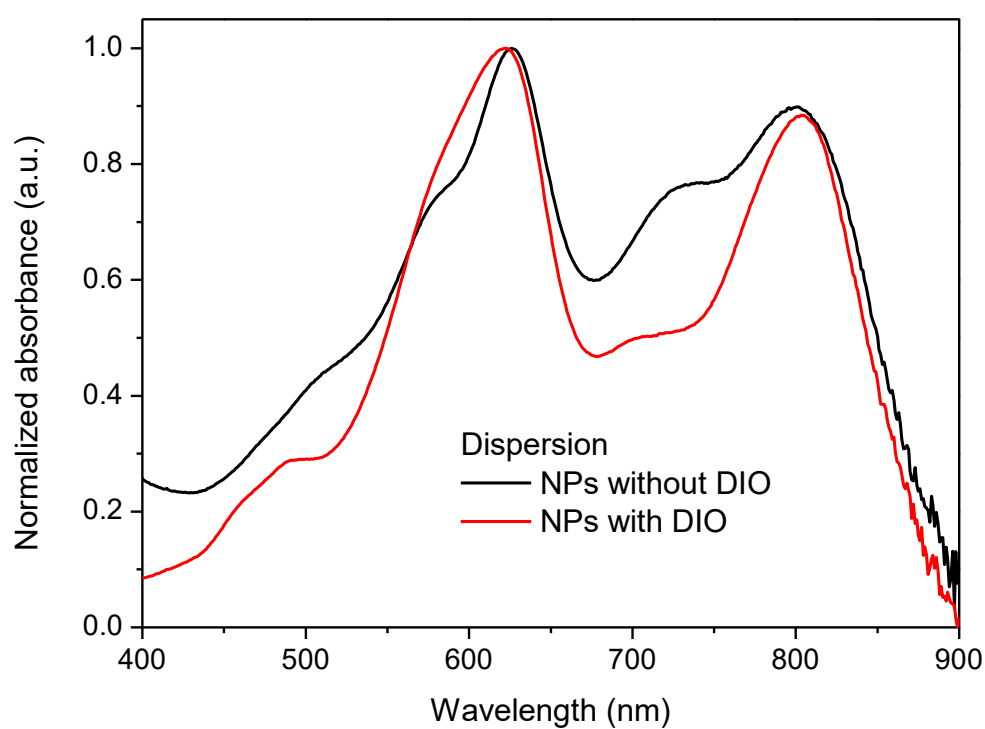

**Figure S4.** Normalized UV-vis absorption spectra of PM6:BTP-eC9 ssNP in water dispersion.

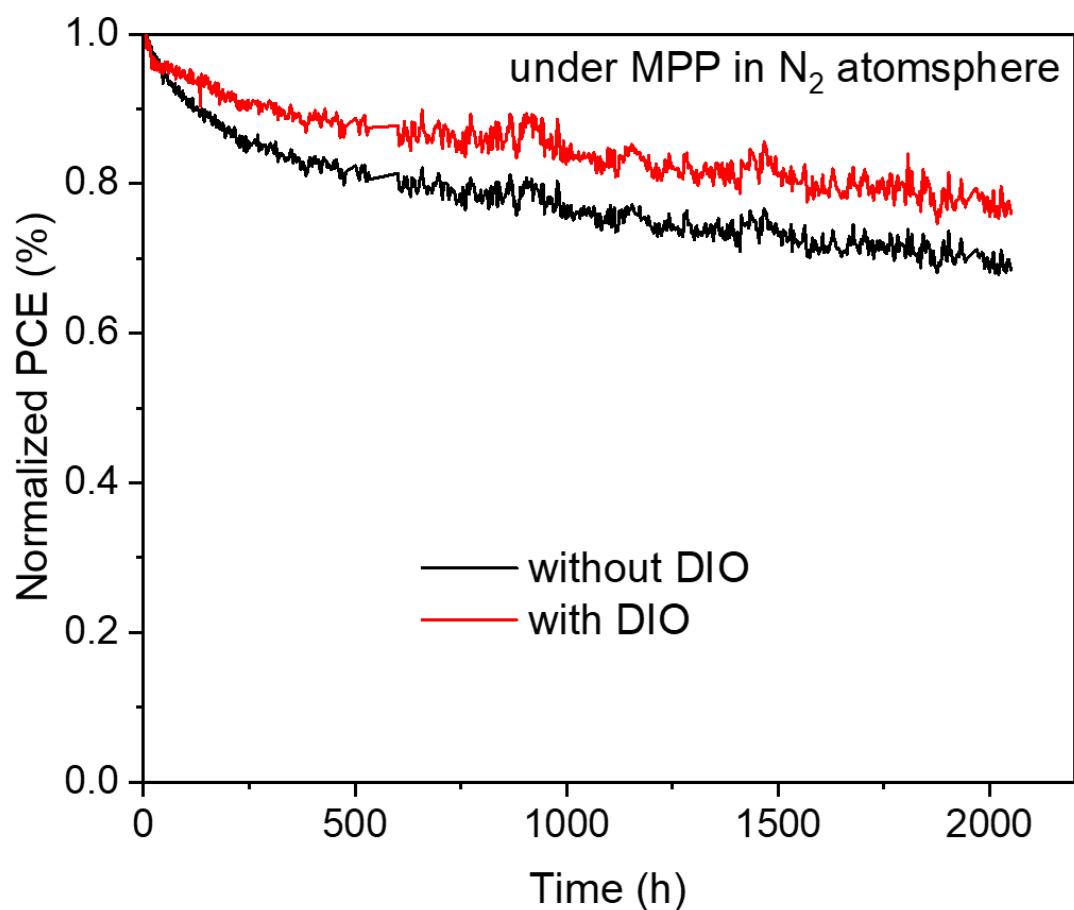

**Figure S5.** Normalized PCE decay of PM6:BTP-eC9 ssNP processed solar cells under maximum power point (MPP) tracking in N<sub>2</sub> atmosphere.

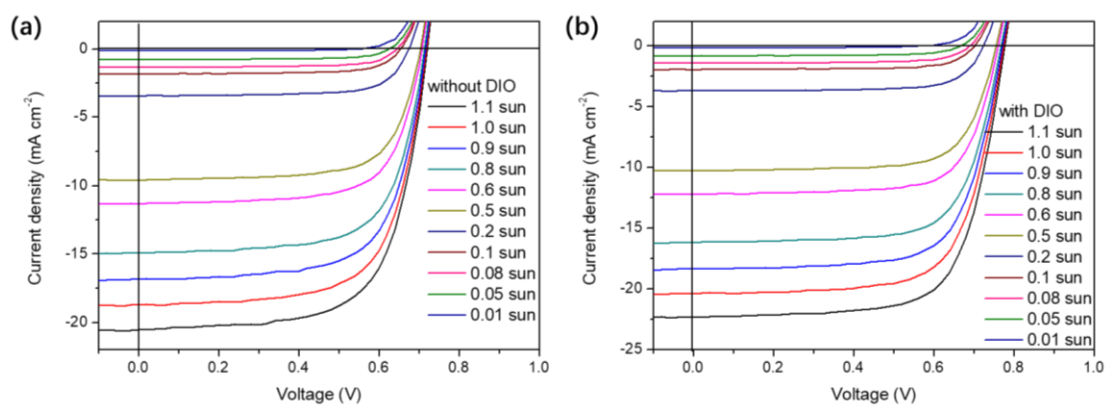

**Figure S6.** J-V characteristics of PM6:BTP-eC9 ssNP processed solar cells (a) without DIO and (b) with DIO under different light intensities.
